# Supplementary material
Source: Springer Nature journal article supplement (https://www.springermedizin.de/resource/supplementary/12875_2010_512_MOESM3_ESM.pdf/9434768)
Supplement: MOESM3 [file 9434768]

## **STROKE PATIENT**

**Click the links for stroke prevention advice:**

**Blood pressure target: 130/80 mm Hg**

**Statin if cholesterol >3.5 mmol/l**

**Aspirin PLUS dipyridamole for all patients  
with non-haemorrhagic strokes**

**Record stroke as either haemorrhage or  
infarct**
